# Supplementary material for: Glucose-Induced Expression of DAPIT in Pancreatic β-Cells
Source: PubMed Central journal article supplement (PMC7408392; doi:10.3390/biom10071026), 2020-07-10

## SUPPLEMENTARY DATA

**Figure S1**

**Typical changes in DAPIT mRNA levels in INS-1E cells:** **a)** upon decreasing glucose down from 11 mM; or **b)** their recovery upon restoration of glucose to 11 mM or to a surplus 20 mM glucose; or **c)** for routinely cultured cells (N=2) transferred to medium containing 20 mM glucose. Panels **a)** and **b)** show separate experiments: **a)** DAPIT to  $\beta$ -actin mRNA ratios for ascribed conditions; ANOVA (n=3): (\*\* P<0.05; \* P<0.1; ns, non-significant). **b)** Time courses for the DAPIT to  $\beta$ -actin mRNA ratios evolved after the settings to the indicated concentrations of glucose in INS-1E<sup>Scr1</sup> cells pretreated in media with 3 mM glucose (time zero point should correspond to the green bar in panel **a)**). Data were calculated by the  $2^{-\Delta\Delta CT}$  method (see 2.2.1.) at each time point (n=3) when induced by 3 mM (green), 11 mM (blue) and 20 mM glucose (red) or not-induced ("zero", gray; black for DAPIT-silenced cells). Light colors (light green, aquamarine and pink) show the data points obtained in DAPIT silenced cells (at 3 mM, 11 mM and 20 mM glucose, respectively). ANOVA: Significances related to zero glucose are denoted by asterisk (\*\* P<0.001; \* P<0.05), while those related to the initial (zero) time point are denoted by hashtags (### P<0.001).

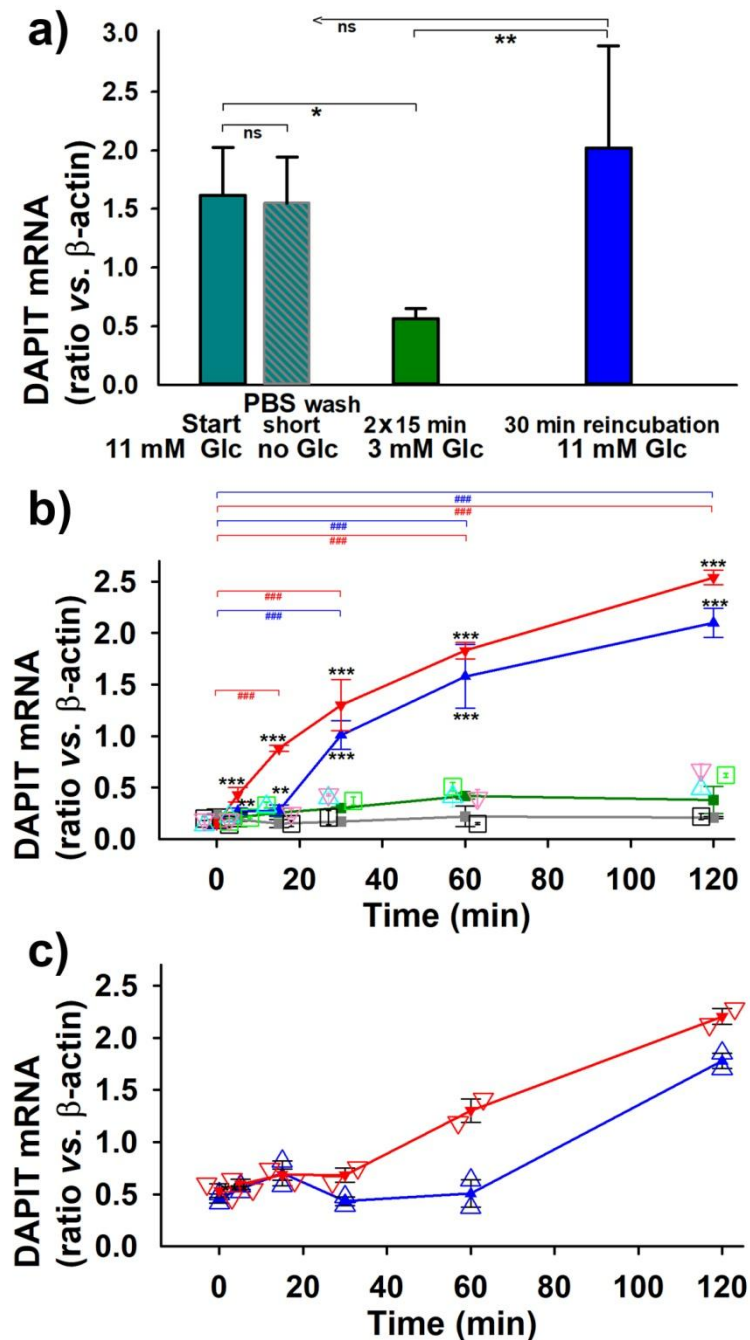

**Figure S2**

**Downregulation/recovery of transcripts for ATP-synthase  $F_0$  subunits e, f, and g** – encountered mRNA down-regulations at slow metabolism for selected  $F_0$  subunits (a–c) as induced by the standard pretreatment in media containing 3 mM glucose (see Methods) and their recoveries. ANOVA (n=3): (\*\* $P < 0.001$ ; \* $P < 0.05$ ; \* $P < 0.1$ ; ns, non-significant). Arbitrary units are used.

**d– f)** Typical changes in mRNA levels relatively to  $\beta$ -actin mRNA of selected  $F_0$  subunits upon restoration of glucose from 3 mM (time zero) to 11 mM or to a surplus 20 mM. Time courses evolved after the settings to the indicated concentrations of glucose in INS-1E<sup>Scr1</sup> cells pretreated in media with 3 mM glucose (Note the point of time zero should correspond to the green bars in panels a–c). Data were calculated by the  $2^{-\Delta\Delta CT}$  method (see 2.2.1.) at each time point (n=3) when induced by 3 mM (green), 11 mM (blue) and 20 mM glucose (red) or not-induced (“zero”, gray; black for DAPIIT-silenced cells). Light colors (light green, aquamarine and pink) show the data points obtained in DAPIIT silenced cells (at 3 mM, 11 mM and 20 mM glucose, respectively). ANOVA: Significances related to zero glucose are denoted by asterix (\*\* $P < 0.001$ ; \* $P < 0.05$ ), while those related to the initial time point are denoted by hashtags (###  $P < 0.001$ ).

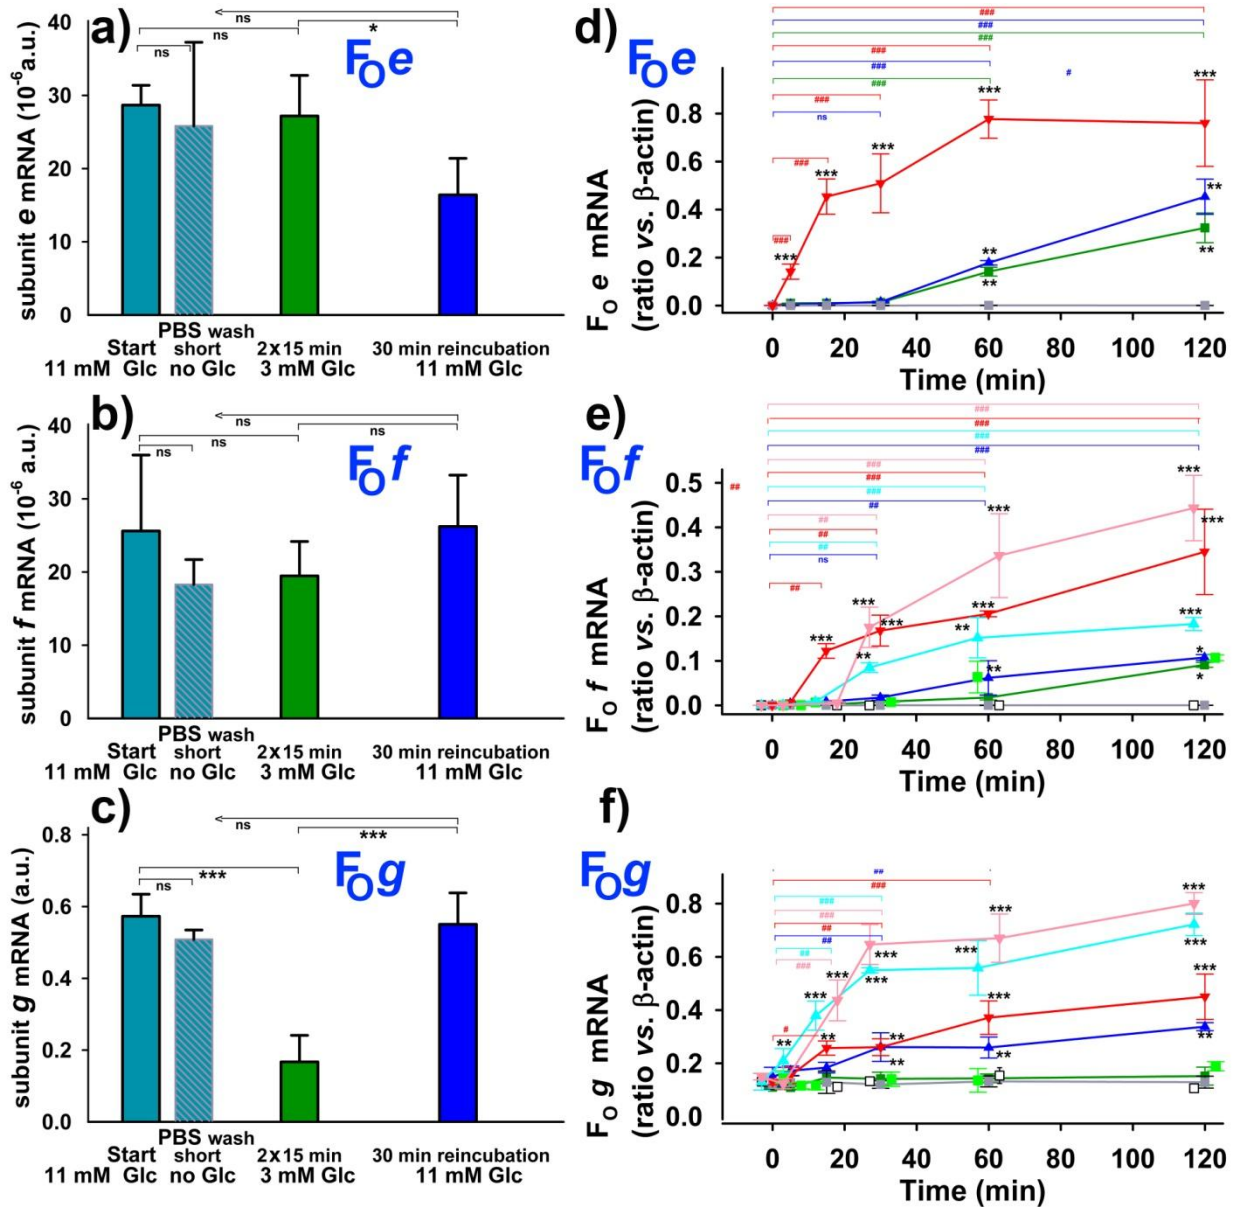

**Figure S3 Supplement to Figure 5a-f and 5h**

Typical results of DAPIT silencing are shown in Fig.S3a for DAPIT/USMG5 mRNA in INS-1E cells transfected with

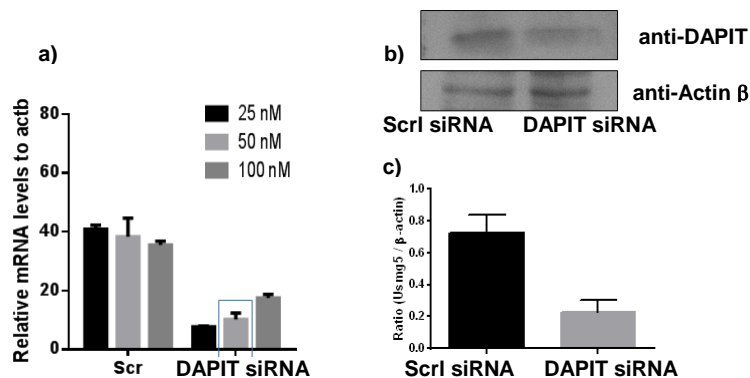

siRNA of scrambled sequence (“Scr”) and with DAPIT siRNA; panel **b**) illustrates typical Western blots immunostained by reportedly anti-DAPIT antibodies, while panel **c**) presents quantification of  $N=5$  experiments.

**Figure S4 Supplement to Figure 5g**

**Exemplar Western blots** out of  $N=3$  biological replicates are shown for subunit  $F_1\alpha$  (**a**) or  $\beta$ -actin (**b**) concerning data of Figure 5g. Moreover,  $F_1\alpha$  mRNA (*dashed bars*) and protein levels (*black bars*) are shown for the alternative 2hr-incubations without the previous pretreatment in 3 mM glucose (**c**). Thus the cells were taken from the maternal cell passage and were incubated for 2 hrs in the culturing medium with normal fetal calf serum content, but without pyruvate containing the indicated glucose concentrations.

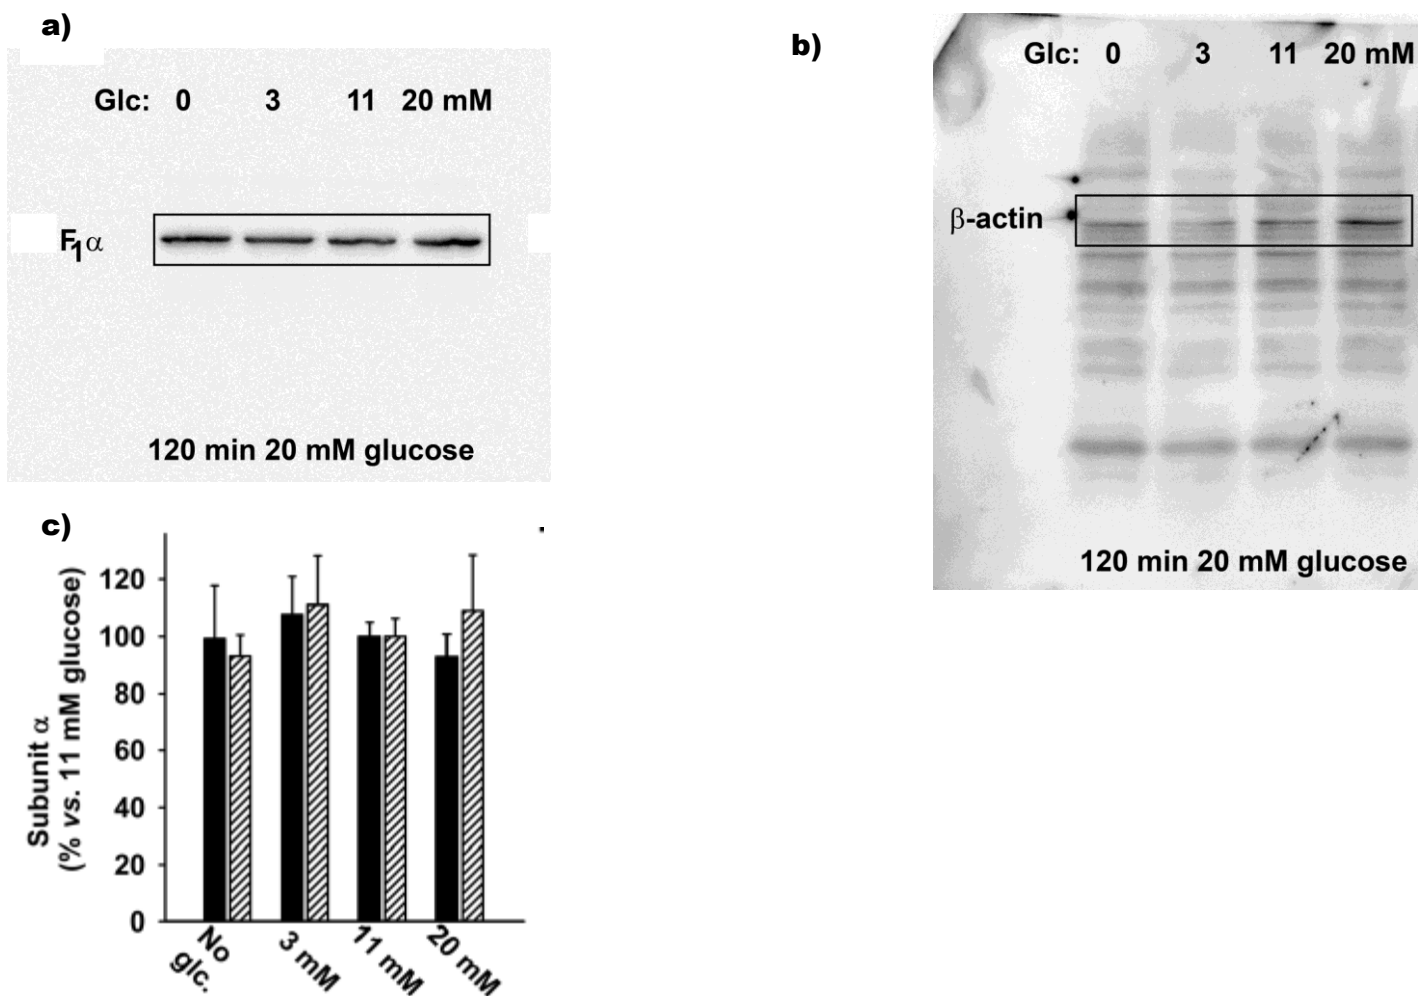

**Figure S5 Supplement to Figure 6**

**Fig.S5 Surplus ATP accumulation as induced with indicated glucose doses** for INS-1E cells transfected with scrambled siRNA (shades of blue) and with DAPIT siRNA (shades of magenta and pink). Values represent the net ATP elevations, *i.e.* values with subtracted background.

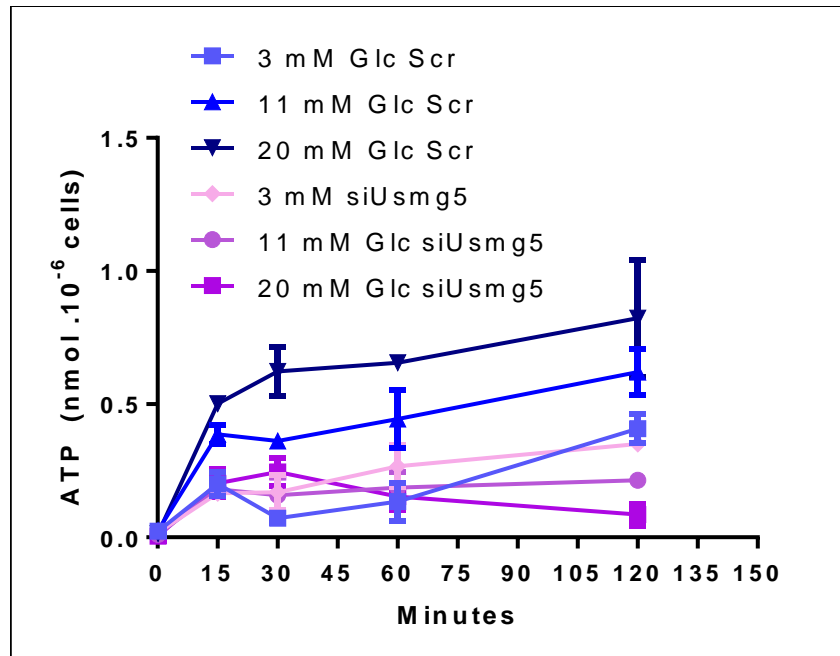

**Fig.S6 Supplement to Figure 10**

**Anti-DAPIT/USMG5 antibodies recognize a complex above ~75 kDa**

Full-scale western blots are shown for DAPIT (a) and actin  $\beta$  (b), “actin b”) from an exemplar SDS-PAGE gel. Similar Western blot was made also against the samples of INS1E cells silenced for DAPIT as shown in the panel c), including the DAPIT protein semi-quantification.

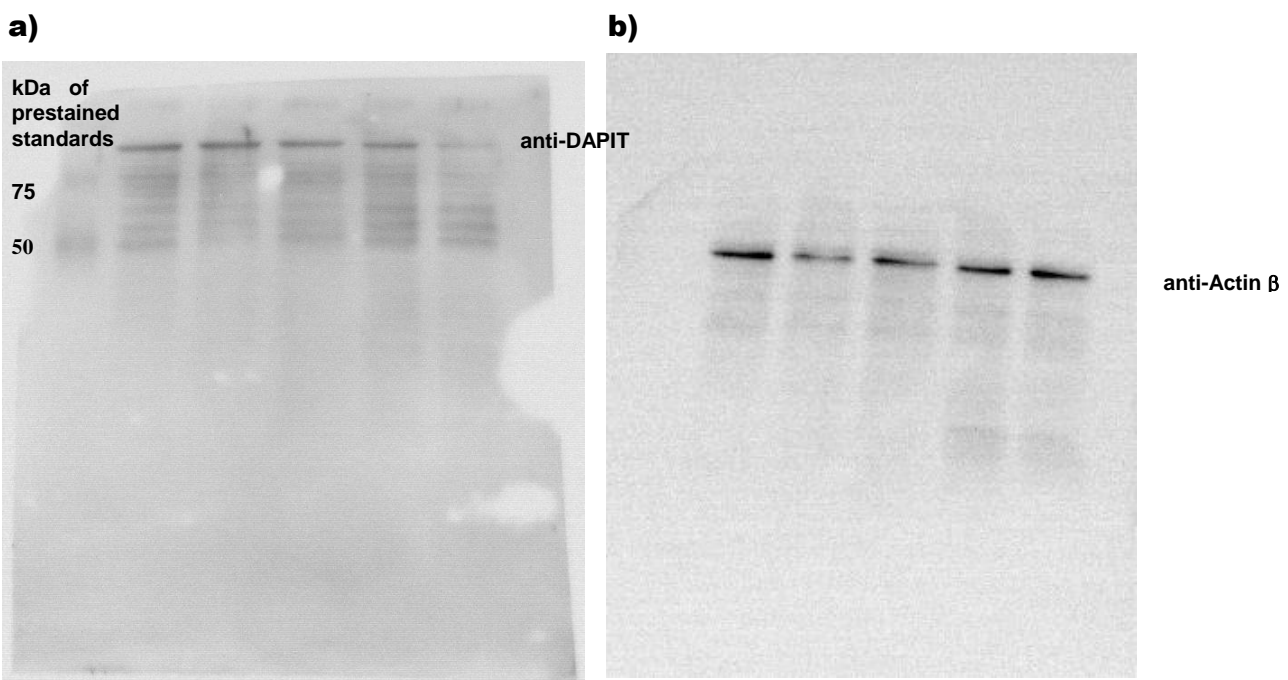

Supplement: biomolecules-10-01026-s001.pdf [file biomolecules-10-01026-s001.pdf]
